# Supplementary material for: Occurrence of Mobile Colistin Resistance Genes mcr-1–mcr-10 including Novel mcr Gene Variants in Different Pathotypes of Porcine Escherichia coli Isolates Collected in Germany from 2000 to 2021
Source: MDPI journal article supplement (doi:10.3390/applmicrobiol4010005), 2023-12-28
Supplement: s1 [file s1]

|                                      |      |      |      |      |     |     |     |     |   |    |   |    |  |  |               |
|--------------------------------------|------|------|------|------|-----|-----|-----|-----|---|----|---|----|--|--|---------------|
| <i>estb, estap, fanA</i>             | 67   |      |      |      |     |     |     |     |   |    |   |    |  |  | <b>67</b>     |
| <i>estb, estap, fasA</i>             | 17   |      |      |      |     |     |     |     |   |    |   |    |  |  | <b>17</b>     |
| <i>estb, estap, fedA</i>             | 513  |      |      |      |     |     |     |     |   |    |   |    |  |  | <b>513</b>    |
| <i>estb, estap, faeG, fanA</i>       | 1    |      |      |      |     |     |     |     |   |    |   |    |  |  | <b>1</b>      |
| <i>estb, estap, faeG, fedA</i>       | 3    |      |      |      |     |     |     |     |   |    |   |    |  |  | <b>3</b>      |
| <i>estb, estap, faeG, fedA, stx2</i> |      |      |      |      |     | 3   |     |     |   |    |   |    |  |  | <b>3</b>      |
| <i>estb, estap, fedA, stx2</i>       |      |      |      |      |     | 454 |     |     |   |    |   |    |  |  | <b>454</b>    |
| <i>estb, estap, stx2</i>             |      |      |      |      |     |     |     |     |   |    |   | 44 |  |  | <b>44</b>     |
| <i>estb, stx2</i>                    |      |      |      |      |     |     |     |     |   |    |   | 6  |  |  | <b>6</b>      |
| <i>estb, stx2, fedA</i>              |      |      |      |      |     | 10  |     |     |   |    |   |    |  |  | <b>10</b>     |
| <i>stx2</i>                          |      |      |      |      |     |     |     | 367 |   |    |   |    |  |  | <b>367</b>    |
| <i>stx2, fedA</i>                    |      |      | 1348 |      |     |     |     |     |   |    |   |    |  |  | <b>1348</b>   |
| <i>stx2, faeG, fedA</i>              |      |      |      |      |     |     |     |     | 2 |    |   |    |  |  | <b>2</b>      |
| <i>faeG</i>                          |      |      |      |      | 44  |     |     |     |   |    |   |    |  |  | <b>44</b>     |
| <i>fanA</i>                          |      |      |      |      | 1   |     |     |     |   |    |   |    |  |  | <b>1</b>      |
| <i>fasA</i>                          |      |      |      |      | 2   |     |     |     |   |    |   |    |  |  | <b>2</b>      |
| <i>fedA</i>                          |      |      |      |      | 790 |     |     |     |   |    |   |    |  |  | <b>790</b>    |
| <i>fimF41a</i>                       |      |      |      |      | 23  |     |     |     |   |    |   |    |  |  | <b>23</b>     |
| <i>faeG, fasA</i>                    |      |      |      |      | 1   |     |     |     |   |    |   |    |  |  | <b>1</b>      |
| <i>faeG, fedA</i>                    |      |      |      |      | 1   |     |     |     |   |    |   |    |  |  | <b>1</b>      |
| <b>Total number</b>                  | 3369 | 2650 | 1348 | 1310 | 862 | 563 | 367 | 1   | 2 | 23 | 3 | 75 |  |  | <b>10,573</b> |
