# Supplementary material for: Occurrence of Mobile Colistin Resistance Genes mcr-1–mcr-10 including Novel mcr Gene Variants in Different Pathotypes of Porcine Escherichia coli Isolates Collected in Germany from 2000 to 2021
Source: MDPI journal article supplement (doi:10.3390/applmicrobiol4010005), 2023-12-28
Supplement: s1 [file s1]

**Table S1.** Primers and positive control strains or DNA used for multiplex PCRs to detect virulence-associated genes and *mcr-1* to *mcr-10* genes.

| Primer name        | Sequence (5′-3′)       | Target gene | Amplicon size (bp) | Positive control strain / DNA          | Primer reference |
|--------------------|------------------------|-------------|--------------------|----------------------------------------|------------------|
| Multiplex-PCR-VAGs |                        |             |                    |                                        |                  |
| STb-1              | TGCCTATGCATCTACACAAT   | estb        | 113                | E. coli E57                            | [13,14]          |
| STb-2              | CTCCAGCAGTACCATCTCTA   |             |                    |                                        |                  |
| STaP-1             | CAACTGAATCACTTGACTCTT  | estap       | 158                | E. coli 987P, E. coli B41, E. coli E57 | [13,14]          |
| STaP-2             | TTAATAACATCCAGCACAGG   |             |                    |                                        |                  |
| K99-1              | AATACTTGTTTCAGGGAGAAA  | fanA        | 230                | E. coli B41                            | [13,14]          |
| K99-2              | AAC TTTGTGGTTAACTTCCT  |             |                    |                                        |                  |
| LT-1               | GGCGTTACTATCCTCTCTAT   | eltB-Ip     | 272                | E. coli G7                             | [13,14]          |
| LT-2               | TGGTCTCGGTCAGATATGT    |             |                    |                                        |                  |
| F18-1              | TGGTAACGTATCAGCAACTA   | fedA        | 313                | E. coli E57                            | [13,14]          |
| F18-2              | ACTTACAGTGCTATTTCGACG  |             |                    |                                        |                  |
| P987-1             | AAGTTACTGCCAGTCTATGC   | fasA        | 409                | E. coli 987P                           | [13,14]          |
| P987-2             | GTAAC TCCACCGTTTGTATC  |             |                    |                                        |                  |
| F-EaeA-1           | ATATCCGTTTTAATGGCTATCT | eae         | 425                | E. coli TTP-1                          | [15]             |
| F-EaeA-2           | AATCTTCTGCGTACTGTGTTCA |             |                    |                                        |                  |
| K88-1              | GAATCTGTCCGAGAATATCA   | faeG        | 499                | E. coli G7                             | [13,14]          |
| K88-2              | GTTGGTACAGGTCTTAATGG   |             |                    |                                        |                  |
| F41-1              | AGTATCTGGTTCAGTGATGG   | fimF41a     | 612                | E. coli B41                            | [13,14]          |
| F41-2              | CCACTATAAGAGGTTGAAGC   |             |                    |                                        |                  |
| Stx2e-1            | AATAGTATACGGACAGCGAT   | stx2        | 733                | E. coli E57, E. coli TTP-1             | [13,14]          |
| Stx2e-2            | TCTGACATTCTGGTTGACTC   |             |                    |                                        |                  |
| Multiplex-PCR-I    |                        |             |                    |                                        |                  |
| CLR F              | CGGTCAGTCCGTTTGTTC     | mcr-1       | 309                | E. coli IHIT22995 (this study)         | [16]             |
| CLR R              | CTTGGTCGGTCTGTAGGG     |             |                    |                                        |                  |
| MCR2-IF            | TGTTGCTTGTGCCGATTGGA   | mcr-2       | 567                | E. coli IHIT31008 [7]                  | [17]             |
| MCR2-IR            | AGATGGTATTGTTGGTTGCTG  |             |                    |                                        |                  |
| MCR3-F             | TTGGCACTGTATTTTGCATTT  | mcr-3       | 542                | E. coli IHIT37100 (this study)         | [18]             |
| MCR3-R             | TTAACGAAATTGGCTGGAACA  |             |                    |                                        |                  |
| Mcr-4 FW           | ATTGGGATAGTCGCCTTTT    | mcr-4       | 488                | Salmonella R3445 [8]                   | [12]             |

|                  |                        |        |      |                                                                |            |
|------------------|------------------------|--------|------|----------------------------------------------------------------|------------|
| Mcr-4 RV         | TTACAGCCAGAATCATTATCA  |        |      |                                                                |            |
| MCR5_rev         | TCATTGTGGTTGTCCTTTTCTG | mcr-5  | 771  | Salmonella 13-SAO1718 [9]                                      | [1]        |
| MCR-5-mp-fw      | TGCATGTTTTCCCTCAATGG   |        |      |                                                                | This study |
| Multiplex-PCR-II |                        |        |      |                                                                |            |
| mcr-6-mp-fw      | AGCTATGTCAATCCCGTGAT   | mcr-6  | 252  | Genomic DNA - Top10F' + pCR2.1-mcr-6 (provided by M. Borowiak) | [19]       |
| mcr-6-mp-rev     | ATTGGCTAGGTTGTCAATC    |        |      |                                                                |            |
| mcr-7-mp-fw      | GCCCTTCTTTTCGTTGTT     | mcr-7  | 551  | Genomic DNA - Top10F' + pCR2.1-mcr-7 (provided by M. Borowiak) | [19]       |
| mcr-7-mp-rev     | GGTTGGTCTCTTTCTCGT     |        |      |                                                                |            |
| mcr-8-mp-fw      | TCAACAATTCTACAAAGCGTG  | mcr-8  | 856  | Genomic DNA - Top10F' + pCR2.1-mcr-8 (provided by M. Borowiak) | [19]       |
| mcr-8-mp-rev     | AATGCTGCGCGAATGAAG     |        |      |                                                                |            |
| mcr-9-mp-fw      | TTCCCTTTGTTCTGGTTG     | mcr-9  | 1011 | E. coli IHIT41513 (this study)                                 | This study |
| mcr-9-mp-rev     | GCAGGTAATAAGTCGGTC     |        |      |                                                                |            |
| mcr-10-mp-F      | TATCCTGAGCCGTCTTGAAC   | mcr-10 | 386  | Enterobacter kobei IHIT44343 (this study)                      | This study |
| mcr-10-mp-R      | GGATCAGCGAAGCGAGCAT    |        |      |                                                                |            |

## References

1. Borowiak, M.; Fischer, J.; Hammerl, J.A.; Hendriksen, R.S.; Szabo, I.; Malorny, B. Identification of a novel transposon-associated phosphoethanolamine transferase gene, *mcr-5*, conferring colistin resistance in d-tartrate fermenting *Salmonella enterica* subsp. *enterica* serovar Paratyphi B. *J. Antimicrob. Chemother.* **2017**, *72*, 3317–3324, <https://doi.org/10.1093/jac/dkx327>.
