# Supplementary material for: Occurrence of Mobile Colistin Resistance Genes mcr-1–mcr-10 including Novel mcr Gene Variants in Different Pathotypes of Porcine Escherichia coli Isolates Collected in Germany from 2000 to 2021
Source: MDPI journal article supplement (doi:10.3390/applmicrobiol4010005), 2023-12-28
Supplement: s1 [file s1]

**Table S3:** Occurrence of *mcr* genes in *E. coli* isolates from samples obtained from (i) diseased pigs or (ii) healthy pigs with defined *E. coli* pathotypes/VAG-typed *E. coli*. Studies that involved the screening of other animals/humans were included only for data as defined under (i) and (ii).

| Country <sup>a</sup> | Year of isolation | Source of samples <sup>b</sup>                                  | No. of <i>E. coli</i> isolates tested for <i>mcr</i> genes <sup>c</sup>      | <i>mcr-1</i>                                            | <i>mcr-2</i>  | <i>mcr-3</i>                                  | <i>mcr-4</i> | <i>mcr-5</i> | <i>mcr-6 – mcr-10</i> | Reference |
|----------------------|-------------------|-----------------------------------------------------------------|------------------------------------------------------------------------------|---------------------------------------------------------|---------------|-----------------------------------------------|--------------|--------------|-----------------------|-----------|
|                      |                   |                                                                 |                                                                              | % (no. of positive isolates per no. of tested isolates) |               |                                               |              |              | no. of pos. isolates  |           |
| AUT                  | n.t.              | Clinical samples of suckling and weaning pigs                   | 102 Ec (22.5% ETEC, 4.9% EDEC)                                               | 2.9% (3/102)                                            | 0% (0/102)    | 0% (0/102)                                    | 0% (0/102)   | 0% (0/102)   | n.t.                  | [44]      |
| BEL                  | 2011-2012         | Diarrheic pigs                                                  | 53 ColR Ec                                                                   | 13.2% (7/53)                                            | 20.8% (11/53) | n.t.                                          | n.t.         | n.t.         | n.t.                  | [17, 45]  |
| CHN                  | 2015-2016         | PWD                                                             | 5 Ec: 3 hybrid ETEC/STEC, 2 aEPEC                                            | 100% (5/5)<br>(3 <i>mcr-1</i> & <i>mcr-3</i> )          | 0% (0/5)      | 60% (3/5)<br>(3 <i>mcr-1</i> & <i>mcr-3</i> ) | 0% (0/5)     | 0% (0/5)     | 0/5                   | [49]      |
| CHN                  | 2017-2018         | 5 swine farms                                                   | 86 Ec which were positive for at least one VAG associated with porcine ExPEC | 100% (86/86)                                            | 0% (0/86)     | 0% (0/86)                                     | 0% (0/86)    | 0% (0/86)    | n.t.                  | [46]      |
| CHN                  | 2020-2021         | Diarrheic pigs                                                  | 19 ETEC                                                                      | 0% (0/19)                                               | 0% (0/19)     | 0% (0/19)                                     | 0% (0/19)    | 0% (0/19)    | 0/19                  | [50]      |
| ESP                  | 1999-2018         | Clinical cases of diarrhoea in neonatal and post-weaned piglets | 200                                                                          | 7% (14/200)                                             | 0% (0/200)    | 0% (0/200)                                    | 13% (27/200) | 3% (6/200)   | n.t.                  | [32]      |
| ESP                  | 2005-2014         | PWD                                                             | 70 (10/year)                                                                 | 20.0% (14/70)                                           | 0% (0/90)     | 0% (0/90)                                     | 1.4% (1/70)  | 0% (0/70)    | n.t.                  | [8]       |
| ESP                  | 2006-2016         | Enteric colibacillosis                                          | 481 Ec tested for <i>mcr-1</i>                                               | 25.6% (123/481)<br>(3 <i>mcr-1</i> & <i>mcr-4</i> ,     | 0% (0/65)     | 0% (0/65)                                     | 4.6% (3/65)  | 6.2% (4/65)  | n.t.                  | [26]      |

| Country <sup>a</sup> | Year of isolation | Source of samples <sup>b</sup>  | No. of <i>E. coli</i> isolates tested for <i>mcr</i> genes <sup>c</sup>                                                     | <i>mcr-1</i>                                                                          | <i>mcr-2</i>                                   | <i>mcr-3</i> | <i>mcr-4</i>                                                                           | <i>mcr-5</i>                                                                        | <i>mcr-6 – mcr-10</i>                                | Reference |
|----------------------|-------------------|---------------------------------|-----------------------------------------------------------------------------------------------------------------------------|---------------------------------------------------------------------------------------|------------------------------------------------|--------------|----------------------------------------------------------------------------------------|-------------------------------------------------------------------------------------|------------------------------------------------------|-----------|
|                      |                   |                                 |                                                                                                                             | % (no. of positive isolates per no. of tested isolates)                               |                                                |              |                                                                                        |                                                                                     | no. of pos. isolates                                 |           |
| ESP                  | 2006-2016         | Enteric colibacillosis          | 65/123 <i>mcr-1</i> -pos. Ec tested for <i>mcr-2</i> , -3, -4, -5<br>35 <i>mcr</i> -positive (35/499 investigated isolates) | 4 <i>mcr-1</i> & <i>mcr-5</i><br>54.3% (19/35)<br>(2 <i>mcr-1</i> & <i>mcr-4</i> )    | 0% (0/35)                                      | 0% (0/35)    | (3 <i>mcr-1</i> & <i>mcr-4</i> )<br>45.7% (16/35)<br>(2 <i>mcr-1</i> & <i>mcr-4</i> )  | (4 <i>mcr-1</i> & <i>mcr-5</i> )<br>5.7% (2/35)                                     | n.t.                                                 | [10]      |
| ESP                  | 2006-2016         | Diarrheic piglets and pork meat | 11 APEC-, UPEC-, and ExPEC-like                                                                                             | 45.5% (5/11)                                                                          | 0% (0/11)                                      | 0% (0/11)    | 0% (0/11)                                                                              | 0% (0/11)                                                                           | 0/11                                                 | [51]      |
| ESP                  | 2006-2017         | PWD                             | 186 Ec:<br>86.5 % ETEC (161/186)<br>5.4% STEC (10/186)<br>8.1% hybrid ETEC/STEC (15/186)                                    | 19.9% (37/186)<br>(2 <i>mcr-1</i> & <i>mcr-4</i> ,<br>2 <i>mcr-1</i> & <i>mcr-5</i> ) | 0% (0/186)                                     | 0% (0/186)   | 54.8% (102/186)<br>(2 <i>mcr-1</i> & <i>mcr-4</i> ,<br>1 <i>mcr-4</i> & <i>mcr-5</i> ) | 2.7% (5/186)<br>(2 <i>mcr-1</i> & <i>mcr-5</i> ,<br>1 <i>mcr-4</i> & <i>mcr-5</i> ] | n.t.                                                 | [3,9]     |
| ITA                  | 2015-2016         | PWD                             | 51                                                                                                                          | 72.5% (37/51)                                                                         | 0% (0/14 <i>mcr-1</i> -negative)               | n.t.         | n.t.                                                                                   | n.t.                                                                                | n.t.                                                 | [11]      |
| ITA                  | After 2019        | Supected enteritis              | 1                                                                                                                           | 0% (0/1)                                                                              | 0% (0/1)                                       | 0% (0/1)     | 0% (0/1)                                                                               | 0% (0/1)                                                                            | <i>mcr-9</i> (1/1)<br><i>mcr-6</i> , -7, -8, -10 (0) | [52]      |
| ITA, ESP, BEL        | 2015-2016         | PWD                             | 125 (50 ColR)<br>ITA: 34, Spain: 43, BEL: 48                                                                                | 25.6% (32/125)                                                                        | 2.4% (3/125)<br>(BEL: P 2, CA 1; see Ref. [1]) | 0% (0/125)   | 8.8% (11/125)                                                                          | n.t.                                                                                | n.t.                                                 | [12]      |
| JPN                  | 2011-2015         | 4 pigs with edema               | 4 Ec (4/4 STEC)                                                                                                             | 100% (4/4)                                                                            | n.t.                                           | n.t.         | n.t.                                                                                   | n.t.                                                                                | n.t.                                                 | [47]      |

| Country <sup>a</sup> | Year of isolation | Source of samples <sup>b</sup>              | No. of <i>E. coli</i> isolates tested for <i>mcr</i> genes <sup>c</sup>                                                                          | <i>mcr-1</i>                                            | <i>mcr-2</i> | <i>mcr-3</i>                                      | <i>mcr-4</i> | <i>mcr-5</i>                                       | <i>mcr-6 – mcr-10</i>                                     | Reference |
|----------------------|-------------------|---------------------------------------------|--------------------------------------------------------------------------------------------------------------------------------------------------|---------------------------------------------------------|--------------|---------------------------------------------------|--------------|----------------------------------------------------|-----------------------------------------------------------|-----------|
|                      |                   |                                             |                                                                                                                                                  | % (no. of positive isolates per no. of tested isolates) |              |                                                   |              |                                                    | no. of pos. isolates                                      |           |
| JPN                  | 2004-2014         | disease from one farm<br>Diseased swine     | 684 (309/684 ColR)                                                                                                                               | 13% (90/684)                                            | n.t.         | n.t.                                              | n.t.         | n.t.                                               | n.t.                                                      | [48]      |
| JPN                  | 2008-2015         | PWD                                         | 120                                                                                                                                              | 30% (36/120)<br>(5 <i>mcr-1</i> & <i>mcr-5</i> )        | 0% (0/120)   | 8.3% (10/120)                                     | 0% (0/120)   | 28.3% (34/120)<br>(5 <i>mcr-1</i> & <i>mcr-5</i> ) | <i>mcr-9</i> (1/120)<br><i>mcr-6, -7, -8, -10</i> (0/120) | [30,31]   |
| KOR                  | 2007-2016         | PWD (100 herds)                             | 364                                                                                                                                              | 1.1% (4/364)<br>(3 <i>mcr-1</i> & <i>mcr-3</i> )        | 0% (0/364)   | 2.2% (8/364)<br>(3 <i>mcr-1</i> & <i>mcr-3</i> )  | n.t.         | n.t.                                               | n.t.                                                      | [35]      |
| KOR                  | 2011-2018         | Diseased pigs                               | 31                                                                                                                                               | n.t.                                                    | n.t.         | 45.2% (14/31)                                     | n.t.         | n.t.                                               | n.t.                                                      | [36]      |
| THA                  | 2007-2013         | Clinically sick pigs                        | 2 ColR                                                                                                                                           | 100% (2/2)<br>(2 <i>mcr-1</i> & <i>mcr-3</i> )          | 0% (0/2)     | 100% (2/2)<br>(2 <i>mcr-1</i> & <i>mcr-3</i> )    | 0% (0/2)     | n.t.                                               | n.t.                                                      | [37]      |
| THA                  | 2011-2018         | Diarrheic pigs                              | 100                                                                                                                                              | 20% (20/100)<br>(13 <i>mcr-1</i> & <i>mcr-3</i> )       | 0% (0/100)   | 70% (70/100)<br>(13 <i>mcr-1</i> & <i>mcr-3</i> ) | 0% (0/100)   | n.t.                                               | n.t.                                                      | [38]      |
| THA                  | 2017-2020         | Healthy farrowing sows and suckling piglets | 70 ColR Ec: 20<br><i>mcr</i> -pos. Ec tested for VAGs present in ETEC and EHEC<br>- non-pathogenic (8/20), ETEC-like (6/20), ETEC (5/20), hybrid | 24.3% (17/70)                                           | 0% (0/70)    | 4.3% (3/70)                                       | 0% (0/70)    | 0% (0/70)                                          | <i>mcr-6, -7, -8</i> (0/70)<br><i>mcr-9, -10</i> n.t.     | [33]      |

| Country <sup>a</sup> | Year of isolation | Source of samples <sup>b</sup>               | No. of <i>E. coli</i> isolates tested for <i>mcr</i> genes <sup>c</sup>                                            | <i>mcr-1</i>                                            | <i>mcr-2</i> | <i>mcr-3</i>                                       | <i>mcr-4</i> | <i>mcr-5</i> | <i>mcr-6 – mcr-10</i> | Reference |
|----------------------|-------------------|----------------------------------------------|--------------------------------------------------------------------------------------------------------------------|---------------------------------------------------------|--------------|----------------------------------------------------|--------------|--------------|-----------------------|-----------|
|                      |                   |                                              |                                                                                                                    | % (no. of positive isolates per no. of tested isolates) |              |                                                    |              |              | no. of pos. isolates  |           |
| THA                  | 2018-2019         | Diarrheic pigs during edema disease outbreak | EHEC-ETEC (1/20)<br>37 (12 non-pathogenic Ec, 9 ETEC-like, 7 AEEC, 5 ETEC, 2 Adhesive Fimbriae Ec, 1 STEC, 1 EDEC) | 48.6% (18/37)<br>(10 <i>mcr-1</i> & <i>mcr-3</i> )      | 0% (0/37)    | 54.1% (20/37)<br>(10 <i>mcr-1</i> & <i>mcr-3</i> ) | 0% (0/37)    | 0% (0/37)    | 0/37                  | [39]      |
| TWN                  | 2012-2016         | Diseased swine                               | In total 492 Ec (2012: 96 Ec, 2013: 252 Ec, 2016: 144 Ec)                                                          | 29.7% (146/492)                                         | n.t.         | n.t.                                               | n.t.         | n.t.         | n.t.                  | [29]      |

<sup>a</sup> 3-letter country abbreviation: AUT, Austria; BEL, Belgium; CHN, China; ESP, Spain; ITA, Italy; JPN, Japan; KOR, The Republic of Korea; THA, Thailand; TWN, Taiwan.

<sup>b</sup> Abbreviation: PWD, Post-weaning diarrhea

<sup>c</sup> Abbreviations: AEEC, attaching and effacing *E. coli*; aEPEC, atypical enteropathogenic *E. coli*; APEC, avian pathogenic *E. coli*; ColR, colistin resistant; Ec, *E. coli*; EDEC, edema disease *E. coli*; EHEC, enterohaemorrhagic *E. coli*; ETEC, enterotoxigenic *E. coli*; ETEC-like, enterotoxigenic-like *E. coli*; ExPEC, extraintestinal pathogenic *E. coli*; STEC, Shiga toxin producing *E. coli*; UPEC, uropathogenic *E. coli*; VAGs, virulence-associated genes.

n.t. = not tested
